# Supplementary material
Source: publisher figshare collection journal article supplement (https://springernature.figshare.com/ndownloader/files/23040011)
Supplement: Supplementary file 1 [file 23040011]

## Sheet: Readme
Additional File 2 - Scoping exercise.

## Sheet: Summary
PICO component	Original Systematic Map Search Terms	Likley terms to include for current Systematic Review	Terms removed from original search string	Questionable ones from original search string	Possible additions	Comments from original search string scoping
subject	Fish*	Fish*
environment type + cause of intervention	(“Fresh water” OR Freshwater OR Stream$ OR Water$ OR River$ OR Fluvial OR Lake$ OR Pond$ OR Wetland$ OR Estuar* OR Reservoir$ OR Canal$ OR Impoundment$ OR “Hydro electric*” OR Hydroelectric* OR “Hydro dam*” OR Hydrodam* OR “Hydro power” OR Hydropower OR “Hydro” OR Dam$ OR Withdraw* OR Diversion$ OR “Climate change”	“Fresh water” OR Freshwater OR Stream$ OR Water$ OR River$ OR Fluvial OR Estuar* OR Reservoir$ OR Impoundment$ OR "Hydro electric*" OR Hydroelectric* OR "Hydro dam*" OR Hydrodam* OR "Hydro power" OR Hydropower OR "Hydro" OR Dam$	Withdraw*, Diversion$, “Climate change"	Lake$, Pond$, Wetland$, Canal$ (reservoirs, impoundments, and canals were combined in data extraction as RESERV - we had a number of hydroXmagXabund with RESERV and some with ESTUARY; but none with LAKE (included ponds) or WETLAND)		scope with and without Canal$
interventions	Flow* OR Discharg*	Flow* OR Discharg*			Magnitude	returned many generic terms capturing irrelevant items with e.g., 'orders of magnitude higher', 'magnitude of contamination', 'assessment of the magnitude'
					Ramp*	returned ~100 more hits than just flow and discharge however most of these are related to fish ramps e.g., rock ramps, or studies related to 'RAMP' abbrevation for reflex action mortality factors. When relevant, flow or dischange terms also present, if not in the abstract, then in key words; therefore, appears to be redundant with flow and discharge
					Peak*	another generic term capturing irrelevant items with e.g., 'peak concentration', 'peak recruitment', 'peak abundance'. When relevant, flow and/or discharge also present; therefore, appears to be redundant with flow/discharge
outcomes	Productivity OR Growth OR Performance OR Surviv* OR Success OR Migrat* OR Passag* OR Reproduc* OR Biomass OR Stress* OR Disease$ OR Mortalit* OR Abundance$ OR Densit* OR Yield$ OR Recruit* OR “Ecological response” OR “Ecosystem response” OR “Biotic response”	Productivity OR Biomass OR Abundance$ OR Densit* OR Yield$	Growth, Performance, Surviv*, Success, Migrat*, Passag*, Reproduc*, Stress*, Disease$, Mortalit*, Recruit*,	“Ecological response”, “Ecosystem response”, “Biotic response”		scope with and without “Ecological response”, “Ecosystem response”, “Biotic response” one by one

## Sheet: Scoping exercise
Date	Database	search #	PICO component	Search string	Restrictions	Change made	Hits	Searcher	Notes	Applicability
25-09-2019	Web of Science Core Collection	1	subject	TS=Fish*	2017-2019; Topic field		84931	Meagan Harper		Original search
25-09-2019		2	environment type/cause	TS=(“Fresh water” OR Freshwater OR Stream$ OR Water$ OR River$ OR Fluvial OR Estuar* OR Reservoir$ OR Impoundment$ OR "Hydro electric*" OR Hydroelectric* OR "Hydro dam*" OR Hydrodam* OR "Hydro power" OR Hydropower OR "Hydro" OR Dam$)	2017-2019; Topic field		614843	Meagan Harper		Original search
25-09-2019		3	interventions	TS=(Flow* OR Discharg*)	2017-2019; Topic field		459714	Meagan Harper		Original search
25-09-2019		4	outcomes	TS=(Productivity OR Biomass OR Abundance$ OR Densit* OR Yield$)	2017-2019; Topic field		742972	Meagan Harper		Original search
25-09-2019		5	all components	1 AND 2 AND 3 AND 4	2017-2019; Topic field		939	Meagan Harper		Original search
25-09-2019		6	environment type/cause	TS=(“Fresh water” OR Freshwater OR Stream$ OR Water$ OR River$ OR Fluvial OR Estuar* OR Reservoir$ OR Impoundment$ OR "Hydro electric*" OR Hydroelectric* OR "Hydro dam*" OR Hydrodam* OR "Hydro power" OR Hydropower OR "Hydro" OR Dam$ OR Canal$)	2017-2019; Topic field	added Canal$ to environment type/cause string	624732	Meagan Harper
25-09-2019		7	all components (revised Canal$)	1 AND 6 AND 3 AND 4	2017-2019; Topic field	added Canal$ to full string	939	Meagan Harper	No change in results with the addition of Canal$. Do not substitute search #6 for search #2	No - no change due to inclusion of Canal$
25-09-2019		8	outcomes	TS=(Productivity OR Biomass OR Abundance$ OR Densit* OR Yield$ OR “Ecological response” OR “Ecosystem response” OR“Biotic response”)	2017-2019; Topic field	added “Ecological response”, “Ecosystem response”, “Biotic response” to outcomes - to see if any new reviews/Mas captured	743186	Meagan Harper
25-09-2019		9	all components (revised “Ecological response”, “Ecosystem response”, “Biotic response”)	1 AND 2 AND 3 AND 8	2017-2019; Topic field		946	Meagan Harper	7 new articles - only one Metcher et al. 2017 likely to be applicable, but is a review. Retain search #8 moving forward.	Yes - captured at least one applicable review
25-09-2019		10	intervention	TS=(Flow* OR Discharg* OR Magnitude)	2017-2019; Topic field	added Magnitude to interventions	541782	Meagan Harper	we were looking for additional (relevant) items that are added that are not already captured by use of Flow* or Discharg* terms	No - magnitude does not descibe flow
25-09-2019		11	all components (revised Magnitude)	1 AND 2 AND 10 AND 8	2017-2019; Topic field	added Magnitude to full string	1106	Meagan Harper
25-09-2019		12	intervention	TS=(Flow* OR Discharg* OR Ramp*)	2017-2019; Topic field	added Ramp* to interventions	465522	Meagan Harper
25-09-2019		13	all components (revised Ramp*)	1 AND 2 AND 12 AND 8	2017-2019; Topic field	added Ramp* to full string	950	Meagan Harper	Only 4 articles obtained, none apply even to the map criteria. One considered ramp potentail of Jagla fluid, another considered crab fecundity when returned to water on a ramp, one considered climbing success of eels on passage ramps, and one considered the effect of temperature ramps on fish metabolism. In no instance was the term Ramp* used in relation to flow	No - captured only 4 more articles, none of them applicable
25-09-2019		14	intervention	TS=(Flow* OR Discharg* OR Peak*)	2017-2019; Topic field	added Peak* to interventions	589379	Meagan Harper		No - peak does not describe flow
25-09-2019		15	all components (revised Peak*)	1 AND 2 AND 14 AND 8	2017-2019; Topic field	added Peak* to full string	1176	Meagan Harper		223 hits not in search #9. Total of 223 no (mostly marine, no flow components considered), one of which used hydro-peaking as a descriptor of a river, but that didn't look at how flow was affecting fish productivity (looked at restoration). There were 7 "maybe" hits which may considere flow alterations, but where peak was not associated with flow. Most often peak was used to describe abundance, b…
30-09-2019		16	all components	1 AND 2 AND 3 AND 8	2017-2019; Topic field	no change in terms; just a different day	952	Trina Rytwinski	I was looking for irrelevant terms to incorporate NOT statements to improve sensitivity: aquaculture, "wastewater treatment", mining, "mine site", carbon
30-09-2019		17	environment type/cause	TS=aquaculture	2017-2019; Topic field		9466	Trina Rytwinski
30-09-2019		18	all components + NOT aquaculte	1 AND 2 AND 3 AND 8 NOT 17	2017-2019; Topic field	NOT aquaculture	861	Trina Rytwinski	reduced hits by 91; more sensitive
30-09-2019		19	environment type/cause	TS="wastewater treatment"	2017-2019; Topic field		14007	Trina Rytwinski
30-09-2019		20	all components + NOT "wastewater treatment"	1 AND 2 AND 3 AND 8 NOT 19	2017-2019; Topic field	NOT wastewater treatment	942	Trina Rytwinski	reduced hits by 10
30-09-2019		21	environment type/cause	TS=(mining OR "mine site")	2017-2019; Topic field		54976	Trina Rytwinski
30-09-2019		22	all components + NOT (mining OR "mine site")	1 AND 2 AND 3 AND 8 NOT 21	2017-2019; Topic field	NOT (mining OR "mine site")	942	Trina Rytwinski	reduced hits by 10
30-09-2019		23	all components + NOT ((mining OR "mine site") OR aquaculture OR "wastewater treatment")	1 AND 2 AND 3 AND 8 NOT (17 OR 19 OR 21)	2017-2019; Topic field	NOT ((mining OR "mine site") OR aquaculture OR "wastewater treatment")	841	Trina Rytwinski	reduced hits by 111
30-09-2019		24	term	TS=carbon	2017-2019; Topic field		292380	Trina Rytwinski
30-09-2019		25	all components + NOT carbon	1 AND 2 AND 3 AND 8 NOT 24	2017-2019; Topic field	NOT carbon	879	Trina Rytwinski	reduced hits by 73
30-09-2019		26	all components + NOT ((mining OR "mine site") OR aquaculture OR "wastewater treatment" OR carbon)	1 AND 2 AND 3 AND 8 NOT (17 OR 19 OR 21 OR 25)	2017-2019; Topic field	NOT ((mining OR "mine site") OR aquaculture OR "wastewater treatment" OR carbon)	780	Trina Rytwinski	reduced hits by 172
	FINAL string			TS=((Fish*) AND (“Fresh water” OR Freshwater OR Stream$ OR Water$ OR River$ OR Fluvial OR Estuar* OR Reservoir$ OR Impoundment$ OR "Hydro electric*" OR Hydroelectric* OR "Hydro dam*" OR Hydrodam* OR "Hydro power" OR Hydropower OR "Hydro" OR Dam$) AND (Flow* OR Discharg*) AND (Productivity OR Biomass OR Abundance$ OR Densit* OR Yield$ OR “Ecological response” OR “Ecosystem response” OR“Biotic resp…

## Sheet: Articles retrieved
Search type	Database	Number of records
Search from map	Multiple	134
Update (2017-2019)	Web of Science Core Collection	786
Update (2017-2019)	ProQuest Dissertations & Theses Global	72
Update (2017-2019)	Scopus	721
Update (2017-2019)	Federal Science Library (Canada)	85
Update (2017-2019)	Science.gov	428
Update (2017-2019)	AGRICOLA	0
Update (2017-2019)	Google Scholar	First 500
	Total	Approximately 2700
